# Supplementary material for: Applications and limitations of Centers for Disease Control and Prevention miniature light traps for measuring biting densities of African malaria vector populations: a pooled-analysis of 13 comparisons with human landing catches
Source: Malar J. 2015 Jun 18;14:247. doi: 10.1186/s12936-015-0761-9 (PMC4470360; doi:10.1186/s12936-015-0761-9)
Supplement: Additional file 4: — Sample data. [file 12936_2015_761_MOESM4_ESM.csv]

Site	Start date	HLC	LTC
Luba	30/03/2009	149	89
Luba	31/03/2009	206	138
Luba	21/05/2009	122	69
Luba	22/05/2009	215	56
Luba	09/07/2009	187	35
Luba	10/07/2009	178	23
Luba	03/09/2009	10	3
Luba	04/09/2009	12	0
Luba	02/11/2009	132	36
Luba	03/11/2009	59	11
Mongola	23/03/2009	316	15
Mongola	24/03/2009	222	10
Mongola	25/03/2009	194	20
Mongola	26/03/2009	234	30
Mongola	18/05/2009	330	12
Mongola	19/05/2009	223	50
Mongola	06/07/2009	218	11
Mongola	07/07/2009	231	25
Mongola	31/08/2009	443	79
Mongola	01/09/2009	439	102
Mongola	09/11/2009	174	25
Mongola	10/11/2009	148	12
Riaba	01/04/2009	66	21
Riaba	02/04/2009	48	7
Riaba	25/05/2009	41	5
Riaba	26/05/2009	67	1
Riaba	13/07/2009	42	6
Riaba	14/07/2009	16	3
Riaba	08/09/2009	65	1
Riaba	09/09/2009	120	12
Riaba	05/11/2009	19	0
Riaba	06/11/2009	13	7
